# Supplementary material
Source: PubMed Central journal article supplement (PMC8034674)
Supplement: Soares_Appendix.pdf [file Soares_Appendix.pdf]

Appendix Figure 1: Aggressive Respiratory Intervention (ARI) Protocol Flowchart

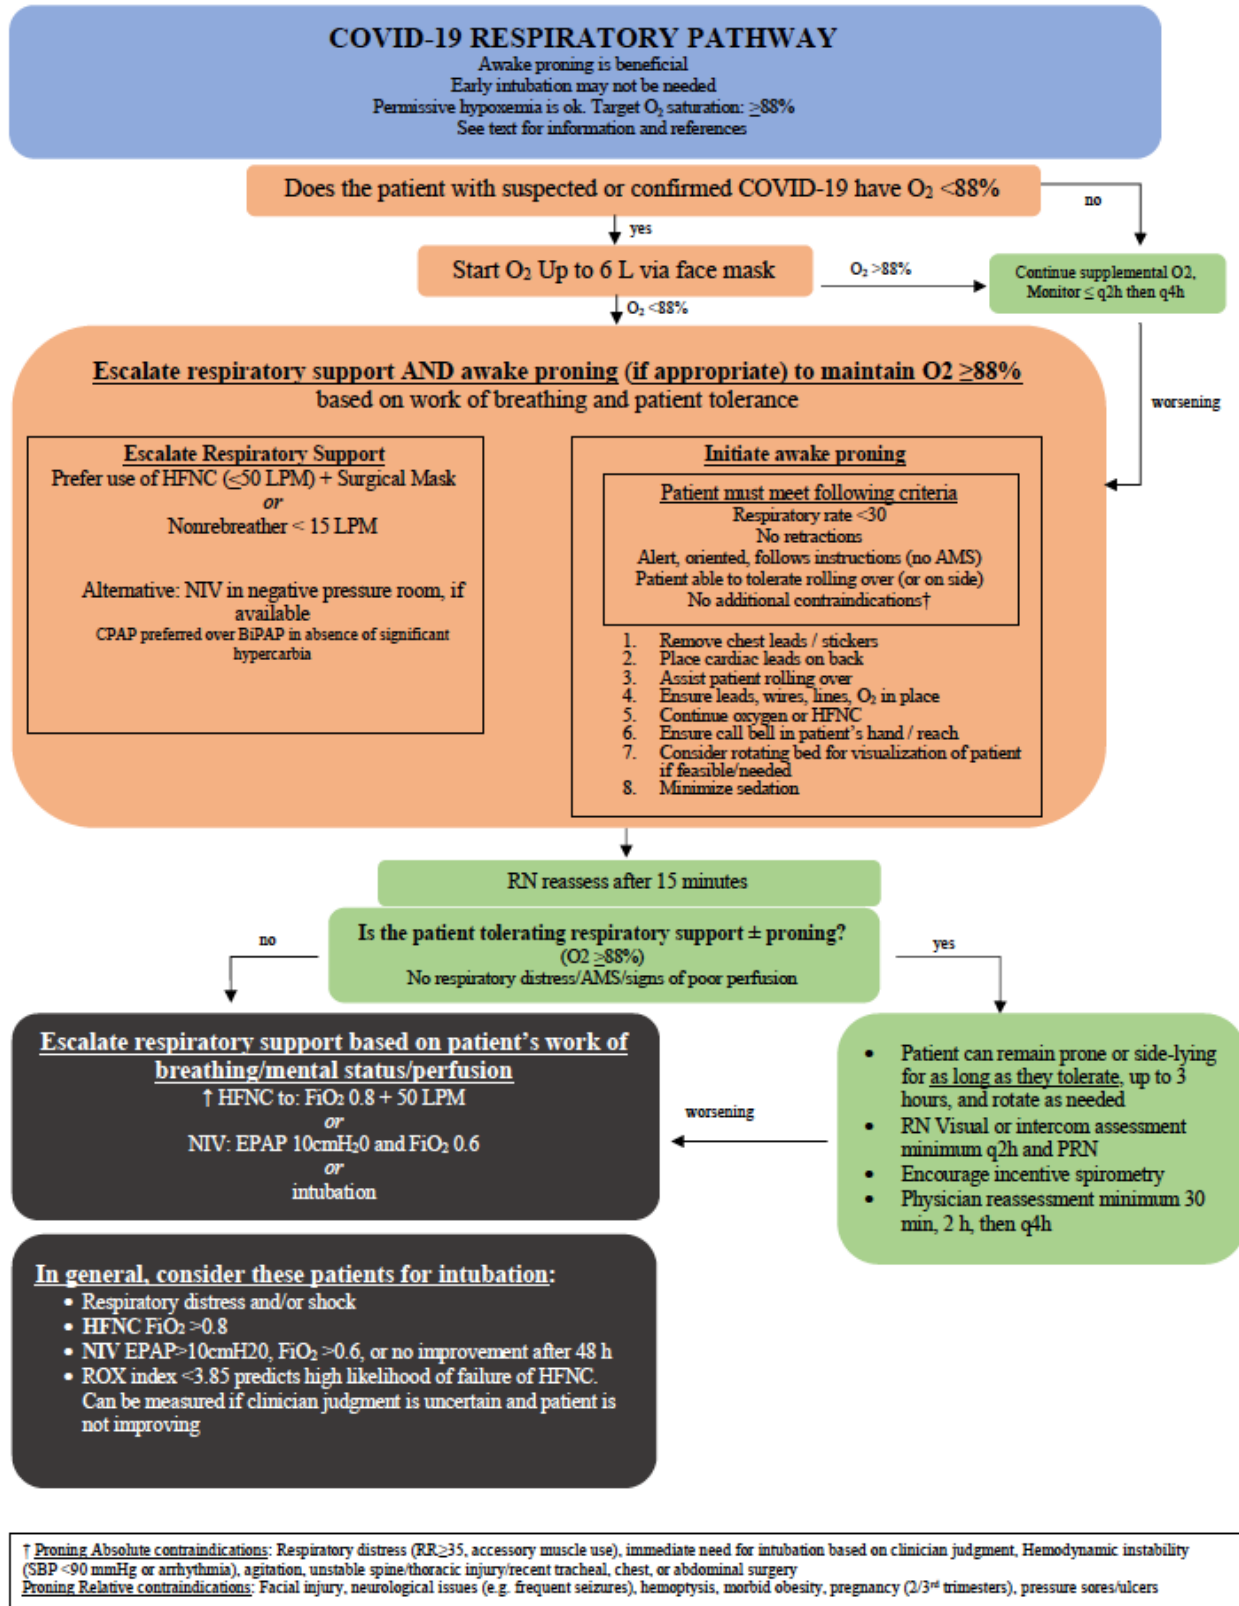

## Chart Review

Record ID \_\_\_\_\_

### Identifying Information

Double check the information below

COVID status from chart review

- Positive test resulted  
 Negative test resulted  
 No test resulted

If no test in system, does a clinician's note clearly document a positive test elsewhere (such as at a nursing home or outside facility)?

- Yes  
 No  
 Unsure

**If patient does not have a positive test or a mention of a positive test outside of the hospital, STOP HERE.**

Site

- BMC  
 BNH  
 BFMC  
 BWH  
 BMLH

Was the patient a direct transfer from another facility?  
(not SNF, but other hospital)

- Yes  No

Account Number \_\_\_\_\_

Inpatient Admit Date/Time \_\_\_\_\_

(Double check that this is the admission for COVID and not a different admission)

Name \_\_\_\_\_

CMRN \_\_\_\_\_

Date of Birth \_\_\_\_\_

Sex

- Female  
 Male

Race  
(This can be found in Patient Information)

White  
 Black  
 Asian  
 Native American  
 Pacific Islander

Ethnicity  
(This can be found in Patient Information)

Hispanic  
 non-Hispanic  
 Russian

Primary Language  
(This can be found in Patient Information)

English  
 Spanish  
 Other

Other Language

\_\_\_\_\_

What type of insurance does this patient have?

MediCARE  
 MediCAID (mass health)  
 private (blue cross, aetna, cigna, health new england)  
 VA  
 self-pay  
 other

If other, list name

\_\_\_\_\_

Reason for Visit

\_\_\_\_\_

**ED Information**

Date of data collection or update  
(Date you are entering this data - click today)

\_\_\_\_\_

Date/Time of ED arrival  
(Start of triage)

\_\_\_\_\_

**Triage Vitals**

BMI

\_\_\_\_\_

Systolic BP

\_\_\_\_\_

Diastolic BP

\_\_\_\_\_

Heart Rate

\_\_\_\_\_

Temp

\_\_\_\_\_

---

Resp Rate \_\_\_\_\_

---

O2 Sat \_\_\_\_\_

---

On any supplemental O2  Yes  
 No

---

Type of supplemental O2  NC < 3L  
 NC 3-6L  
 NC >6L  
 NC - flow unknown  
 NRB  
 HFNC  
 NIV  
 Intubated

---

Discharge status from ED (As noted in ED clinician note)  Transfer to In-patient  
 Home  
 SNF  
 Expired

**Admission Information**

---

Initial admission unit (no need to check this) \_\_\_\_\_

---

Initial admission level of care (Can be found in Orders, check date of order)  Floor (acute)  
 Intercare  
 ICU

---

Was level of care escalated to intercare during the admission  Yes  No

---

Date and time care was escalated to intercare \_\_\_\_\_

**During Entire Hospital visit, did the patient use any of the following: (If intubated, only "YES" if used PRIOR to intubation, not post-intubation)  
(This can be found in All Results: Respiratory/Pulmonary Data; except proning will be in clinician notes or orders)**

---

Oxygen by nasal cannula  Yes  No

---

Date/time oxygen by nasal cannula started \_\_\_\_\_

---

High flow nasal cannula  Yes  No

---

Date/time high flow nasal cannula started \_\_\_\_\_

---

AWAKE Proning (not intubated) attempted  Yes  No

---

|                                                                                                                                                                                                                                                                                                  |                                                                                       |
|--------------------------------------------------------------------------------------------------------------------------------------------------------------------------------------------------------------------------------------------------------------------------------------------------|---------------------------------------------------------------------------------------|
| Awake Proning Tolerated?<br>(See physician note for whether they were able to tolerate proning)                                                                                                                                                                                                  | <input type="radio"/> Yes<br><input type="radio"/> No<br><input type="radio"/> Unsure |
| Date/time proning started                                                                                                                                                                                                                                                                        | _____                                                                                 |
| NIV (CPAP or BIPAP)                                                                                                                                                                                                                                                                              | <input type="radio"/> Yes <input type="radio"/> No                                    |
| Date/time NIV started                                                                                                                                                                                                                                                                            | _____                                                                                 |
| Non-rebreather started                                                                                                                                                                                                                                                                           | <input type="radio"/> Yes <input type="radio"/> No                                    |
| Date/time Non-rebreather started                                                                                                                                                                                                                                                                 | _____                                                                                 |
| At any time, did the patient get intubated                                                                                                                                                                                                                                                       | <input type="radio"/> Yes <input type="radio"/> No                                    |
| Date/time intubated                                                                                                                                                                                                                                                                              | _____                                                                                 |
| At any time prior to ICU care, did patient have an RRT                                                                                                                                                                                                                                           | <input type="radio"/> Yes <input type="radio"/> No                                    |
| Date/time RRT called                                                                                                                                                                                                                                                                             | _____                                                                                 |
| At any time prior to ICU care, did patient have an UNEXPECTED cardiac arrest<br>(Note: Select 'No' if patient was made DNR/DNI before cardiac arrest or was in ICU, because then cardiac arrest was expected. We are looking for decompensation on floor or intercare leading to cardiac arrest) | <input type="radio"/> Yes <input type="radio"/> No                                    |
| Date/time cardiac arrest                                                                                                                                                                                                                                                                         | _____                                                                                 |
| Was cardiac arrest within 2 hours before or after an intubation?                                                                                                                                                                                                                                 | <input type="radio"/> Yes <input type="radio"/> No                                    |
| At any time, did patient have an ICU consult                                                                                                                                                                                                                                                     | <input type="radio"/> Yes <input type="radio"/> No                                    |
| Date/time ICU consult                                                                                                                                                                                                                                                                            | _____                                                                                 |
| At any time, did patient get moved to the ICU                                                                                                                                                                                                                                                    | <input type="radio"/> Yes <input type="radio"/> No                                    |
| Date/time move to ICU                                                                                                                                                                                                                                                                            | _____                                                                                 |

**Goals of Care**

At any time during their stay, did the patient have a GOALS OF CARE conversation  Yes  No  Unsure

Who did they have a conversation with, check all that apply  with ED doc  
 with hospitalists  
 with ICU  
 with palliative care

Was the patient DNR/DNI prior to the ED visit  Yes  No

Was the patient made DNR/DNI during this stay  Yes  No

Date/time patient made DNR/DNI during this stay \_\_\_\_\_

How was DNR/DNI decided  patient/family with care team  
 physician-directed (two physicians)  
 other

Other method to decide DNR/DNI \_\_\_\_\_

Was the patient CMO prior to the ED visit  Yes  No

Was the patient made CMO during this stay  Yes  No

Date/time patient made CMO during this stay \_\_\_\_\_

How was CMO decided  patient/family with care team  
 other

Other method to decide CMO \_\_\_\_\_

Patient's status 5 days post admission (morning of 5th day)  
 (Leave blank if 5 days has not passed since admission)  admitted floor  
 admitted intercare  
 intubated or in ICU  
 discharged  
 dead

Patient's status 7 days post admission (morning of 7th day)  
 (Leave blank if 7 days has not passed since admission)  admitted floor  
 admitted intercare  
 intubated or in ICU  
 discharged  
 dead

Patient's status 14 days post admission (morning of 14th day)  
 (Leave blank if 14 days have not passed since admission)  admitted floor  
 admitted intercare  
 intubated or in ICU  
 discharged  
 dead

---

Patients' status reviewed 30 days post admission  
(Leave blank if 30 days have not passed since admission)

- admitted floor
- admitted intercare
- intubated or in ICU
- discharged
- dead

---

Discharge (includes death) date/time

\_\_\_\_\_

---

Discharge Disposition

- Still IP
- Home
- Expired
- SNF
- Other facility
- IP Rehab
- LTC
- Hospice
- Other

---

Other discharge disposition

\_\_\_\_\_

---

**Comments**

Comments

\_\_\_\_\_

### Appendix 3. Patient Flow Diagram

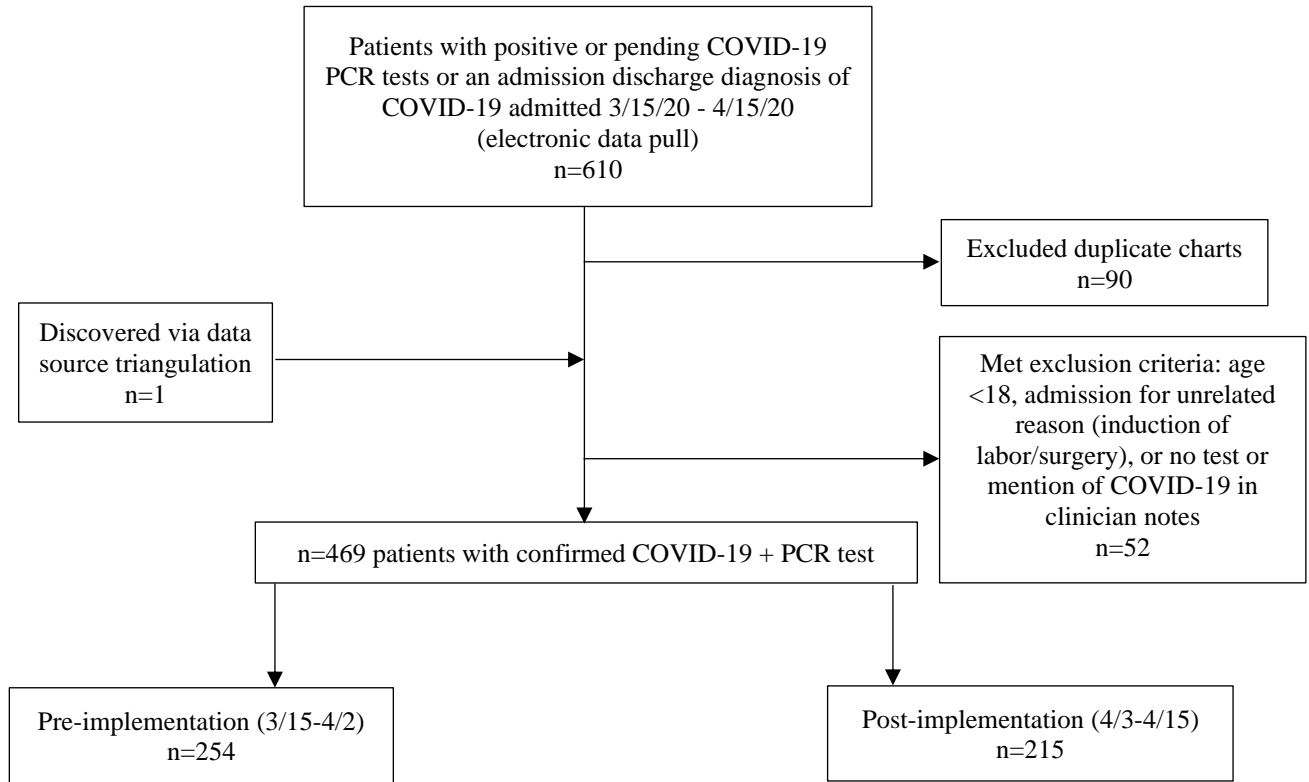



Appendix 4. Revised Standards for Quality Improvement Reporting Excellence (SQUIRE 2.0)  
September 15, 2015

Squire standards and where to find elements (or explanation for missing elements)

| Text Section and Item Name | Section or Item Description                                                                                                                                                                                                                                                                                                                                   |              |
|----------------------------|---------------------------------------------------------------------------------------------------------------------------------------------------------------------------------------------------------------------------------------------------------------------------------------------------------------------------------------------------------------|--------------|
| Title and Abstract         |                                                                                                                                                                                                                                                                                                                                                               |              |
| 1. Title                   | Indicate that the manuscript concerns an initiative to improve healthcare (broadly defined to include the quality, safety, effectiveness, patient- centeredness, timeliness, cost, efficiency, and equity of healthcare)                                                                                                                                      | See Title    |
| 2. Abstract                | <ol style="list-style-type: none"> <li>1. Provide adequate information to aid in searching and indexing</li> <li>2. Summarize all key information from various sections of the text using the abstract format of the intended publication or a structured summary such as: background, local problem, methods, interventions, results, conclusions</li> </ol> | See Abstract |
| Introduction               | Why did you start?                                                                                                                                                                                                                                                                                                                                            | Page 4       |
| 3. Problem Description     | Nature and significance of the local problem                                                                                                                                                                                                                                                                                                                  | Page 4       |
| 4. Available knowledge     | Summary of what is currently known about the problem, including relevant previous studies                                                                                                                                                                                                                                                                     | Page 4       |
| 5. Rationale               | Informal or formal frameworks, models, concepts, and/or theories used to explain the problem, any reasons or assumptions that were used to develop the intervention(s), and reasons why the intervention(s) was expected to work                                                                                                                              | Page 4       |
| 6. Specific aims           | Purpose of the project and of this report                                                                                                                                                                                                                                                                                                                     | Page 4       |
|                            |                                                                                                                                                                                                                                                                                                                                                               | Page 4 and 5 |

|                                 |                                                                                                                                                                                                                                                                                                                                                                                                               |                                                                                                                                                                                                       |
|---------------------------------|---------------------------------------------------------------------------------------------------------------------------------------------------------------------------------------------------------------------------------------------------------------------------------------------------------------------------------------------------------------------------------------------------------------|-------------------------------------------------------------------------------------------------------------------------------------------------------------------------------------------------------|
| Methods                         | What did you do?                                                                                                                                                                                                                                                                                                                                                                                              |                                                                                                                                                                                                       |
| 7. Context                      | Contextual elements considered important at the outset of introducing the intervention(s)                                                                                                                                                                                                                                                                                                                     | Page 4 and 5                                                                                                                                                                                          |
| 8. Intervention(s)              | a. Description of the intervention(s) in sufficient detail that others could reproduce it<br>b. Specifics of the team involved in the work                                                                                                                                                                                                                                                                    | Page 5 and Appendix 1                                                                                                                                                                                 |
| 9. Study of the Intervention(s) | a. Approach chosen for assessing the impact of the intervention(s)<br>b. Approach used to establish whether the observed outcomes were due to the intervention(s)                                                                                                                                                                                                                                             | Page 5                                                                                                                                                                                                |
| 10. Measures                    | 1.Measures chosen for studying processes and outcomes of the intervention(s), including rationale for choosing them, their operational definitions, and their validity and reliability<br>2.Description of the approach to the ongoing assessment of contextual elements that contributed to the success, failure, efficiency, and cost<br>3.Methods employed for assessing completeness and accuracy of data | Page 5 and 6                                                                                                                                                                                          |
| 11. Analysis                    | a. Qualitative and quantitative methods used to draw inferences from the data<br>b. Methods for understanding variation within the data, including the effects of time as a variable                                                                                                                                                                                                                          | Page 5 and 6                                                                                                                                                                                          |
| 12. Ethical Considerations      | Ethical aspects of implementing and studying the intervention(s) and how they were addressed, including, but not limited to, formal ethics review and potential conflict(s) of interest                                                                                                                                                                                                                       | Page 4: The IRB reviewed the plan and deemed it not human subjects research. A full description of the many discussions around medical ethics that occurred during early COVID is not possible in the |

|                    |                                                                                                                                                                                                                                                                                                                                                                                                                                                                                                                                                                                      |                                                                                                                                                                                                                   |
|--------------------|--------------------------------------------------------------------------------------------------------------------------------------------------------------------------------------------------------------------------------------------------------------------------------------------------------------------------------------------------------------------------------------------------------------------------------------------------------------------------------------------------------------------------------------------------------------------------------------|-------------------------------------------------------------------------------------------------------------------------------------------------------------------------------------------------------------------|
|                    |                                                                                                                                                                                                                                                                                                                                                                                                                                                                                                                                                                                      | scope of this paper. The ethics of this project and related projects was discussed at length by many stakeholders                                                                                                 |
| Results            | What did you find?                                                                                                                                                                                                                                                                                                                                                                                                                                                                                                                                                                   |                                                                                                                                                                                                                   |
| 13. Results        | <p>Initial steps of the intervention(s) and their evolution over time (e.g., time-line diagram, flow chart, or table), including modifications made to the intervention during the project</p> <p>Details of the process measures and outcome</p> <p>Contextual elements that interacted with the intervention(s)</p> <p>Observed associations between outcomes, interventions, and relevant contextual elements</p> <p>Details about missing data</p> <p>Unintended consequences such as unexpected benefits, problems, failures, or costs associated with the intervention(s).</p> | <p>Page 6 and tables</p> <p>Due to the length restrictions, we could not report these results in as much details as we would like. Our mortality analysis is our attempt to evaluate unintended consequences.</p> |
| Discussion         | What does it mean?                                                                                                                                                                                                                                                                                                                                                                                                                                                                                                                                                                   |                                                                                                                                                                                                                   |
| 14. Summary        | a. Key findings, including relevance to the rationale and specific aims<br>b. Particular strengths of the project                                                                                                                                                                                                                                                                                                                                                                                                                                                                    | Page 7 and 8                                                                                                                                                                                                      |
| 15. Interpretation | <p>Nature of the association between the intervention(s) and the outcomes</p> <p>Comparison of results with findings from other publications</p> <p>Impact of the project on people and systems</p> <p>Reasons for any differences between observed and anticipated outcomes, including the influence of context</p> <p>Costs and strategic trade-offs, including opportunity costs</p>                                                                                                                                                                                              | Page 7 and 8                                                                                                                                                                                                      |

|                   |                                                                                                                                                                                                                                                                           |                                                                           |
|-------------------|---------------------------------------------------------------------------------------------------------------------------------------------------------------------------------------------------------------------------------------------------------------------------|---------------------------------------------------------------------------|
| 16. Limitations   | <p>a. Limits to the generalizability of the work</p> <p>b. Factors that might have limited internal validity such as confounding, bias, or imprecision in the design, methods, measurement, or analysis</p> <p>c. Efforts made to minimize and adjust for limitations</p> | Page 8                                                                    |
| 17. Conclusions   | <ol style="list-style-type: none"> <li>1. Usefulness of the work</li> <li>2. Sustainability</li> <li>3. Potential for spread to other contexts</li> <li>4. Implications for practice and for further study in the field</li> <li>5. Suggested next steps</li> </ol>       | Page 8 – due to space, we were not able to comment on all of these points |
| Other information |                                                                                                                                                                                                                                                                           |                                                                           |
| 18. Funding       | Sources of funding that supported this work. Role, if any, of the funding organization in the design, implementation, interpretation, and reporting                                                                                                                       | No funding for this study                                                 |
